# Supplementary material for: Intestinal PPARδ protects against diet-induced obesity, insulin resistance and dyslipidemia
Source: PubMed Central journal article supplement (PMC5429805; doi:10.1038/s41598-017-00889-z), 2017-04-12
Supplement: 41598_2017_889_MOESM1_ESM.pdf [file 41598_2017_889_MOESM1_ESM.pdf]

## **Intestinal PPAR $\delta$ protects against diet-induced obesity, insulin resistance and dyslipidemia**

Marcela Doktorova<sup>1\*</sup>, Irene Zwarts<sup>1\*</sup>, Tim van Zutphen<sup>1</sup>, Theo H. van Dijk<sup>2</sup>,  
Vincent W. Bloks<sup>1</sup>, Liesbeth Harkema<sup>3</sup>, Alain de Bruin<sup>1,3</sup>, Michael Downes<sup>4</sup>,  
Ronald M. Evans<sup>4</sup>, Henkjan J. Verkade<sup>1</sup> and Johan W. Jonker<sup>1#</sup>

<sup>1</sup>Section of Molecular Metabolism and Nutrition, Department of Pediatrics and <sup>2</sup>Department of Laboratory Medicine, University of Groningen, University Medical Center Groningen, Hanzeplein 1, 9713 GZ Groningen, The Netherlands. <sup>3</sup>Dutch Molecular Pathology Center, Faculty of Veterinary Medicine, Utrecht University, Yalelaan 1, 3584 CL Utrecht, The Netherlands. <sup>4</sup>Howard Hughes Medical Institute and Gene Expression Laboratory, Salk Institute for Biological Studies, 10010 North Torrey Pines Road, La Jolla, California 92037, USA. #To whom correspondence should be addressed. E-mail: [j.w.jonker@umcg.nl](mailto:j.w.jonker@umcg.nl).

\*These authors contributed equally to this work.

## Supplementary data

### Supplementary Table 1

|                                          | Proximal     |                                                 | Middle       |                                                 | Distal       |                                                 |
|------------------------------------------|--------------|-------------------------------------------------|--------------|-------------------------------------------------|--------------|-------------------------------------------------|
| <b>LFD</b>                               | wild-type    | <i>PPAR<math>\delta</math><sup>IEC-KO</sup></i> | wild-type    | <i>PPAR<math>\delta</math><sup>IEC-KO</sup></i> | wild-type    | <i>PPAR<math>\delta</math><sup>IEC-KO</sup></i> |
| <b>Villus length (<math>\mu</math>m)</b> | 398 $\pm$ 14 | 412 $\pm$ 73                                    | 202 $\pm$ 26 | 224 $\pm$ 27                                    | 197 $\pm$ 13 | 190 $\pm$ 22                                    |
| <b>Crypt depth (<math>\mu</math>m)</b>   | 58 $\pm$ 5   | 64 $\pm$ 5                                      | 69 $\pm$ 8   | 62 $\pm$ 3                                      | 71 $\pm$ 11  | 67 $\pm$ 10                                     |
| <b>Inflammation scoring</b>              | 0            | 0                                               | 0            | 0                                               | 0            | 0                                               |
| <b>HFD</b>                               | wild-type    | <i>PPAR<math>\delta</math><sup>IEC-KO</sup></i> | wild-type    | <i>PPAR<math>\delta</math><sup>IEC-KO</sup></i> | wild-type    | <i>PPAR<math>\delta</math><sup>IEC-KO</sup></i> |
| <b>Villus length (<math>\mu</math>m)</b> | 410 $\pm$ 35 | 383 $\pm$ 66                                    | 266 $\pm$ 70 | 329 $\pm$ 79                                    | 212 $\pm$ 66 | 242 $\pm$ 40                                    |
| <b>Crypt depth (<math>\mu</math>m)</b>   | 71 $\pm$ 9   | 64 $\pm$ 8                                      | 69 $\pm$ 13  | 69 $\pm$ 4                                      | 67 $\pm$ 12  | 73 $\pm$ 14                                     |
| <b>Inflammation scoring</b>              | 0            | 0                                               | 0            | 0                                               | 0            | 0                                               |

**Supplementary Table 1.** Histopathologic analysis of HE stained intestinal sections of wild-type and *PPAR $\delta$ <sup>IEC-KO</sup>* mice after a LFD (n = 3) or a HFD (n = 8). Values are presented as mean  $\pm$  SD. Inflammation scoring: 0 = no inflammation, 1 = mild inflammation, 2 = moderate inflammation, 3 = severe inflammation.

## Supplementary Table 2

| HFD                         | wild-type   | <i>PPAR<math>\delta</math></i> <sup>IEC-KO</sup> |
|-----------------------------|-------------|--------------------------------------------------|
| <b>Sum of steatosis</b>     | 0.5 [0-2]   | 2 [0-3] <sup>*</sup>                             |
| <b>Lobular inflammation</b> | 0 [0-1]     | 0.75 [0-2]                                       |
| <b>Ballooning</b>           | 0 [0-1]     | 0 [0-1]                                          |
| <b>NAFLD activity score</b> | 0.5 [0-3.5] | 3 [0-5] <sup>*</sup>                             |

**Supplementary Table 2.** Liver composition of wild-type and *PPAR $\delta$* <sup>IEC-KO</sup> mice fed a HFD. Values are presented as median; [range] (n = 8). Steatosis grade 0= <5%; 1 = 5-33%; 2 = 33-66%; 3 = >66%. Lobular inflammation 0= none; 1 = <2 foci per 200x; 2 = 2-4 foci. Ballooning 0 = none; 1 = few; 2 = prominent ballooning. NAS = NAFLD activity score (sum of steatosis + lobular inflammation + ballooning). <sup>\*</sup>Significant difference between wild-type and *PPAR $\delta$* <sup>IEC-KO</sup> mice (p<0.05).

### Supplementary Table 3

| Gene          | Forward primer 5' --- 3'           | Reverse primer 5' --- 3'            |
|---------------|------------------------------------|-------------------------------------|
| <b>36b4</b>   | CTG TTG GCC AAT AAG GTG CC         | GGA GGT CTT CTC GGG TCC TA          |
| <b>Abca1</b>  | CCC AGA GCA AAA AGC GAC TC         | GGT CAT CAT CAC TTT GGT CCT TG      |
| <b>Abcg5</b>  | CTC CTC GCC TAC GTG CTA CA         | GAT ACA AGC CCA GAG TCC AAT AAC A   |
| <b>Apoa1</b>  | CCC AGT CCC AAT GGG ACA            | CAG GAG ATT CAG GTT CAG CTG TT      |
| <b>Cre</b>    | GCA TTA CCG GTC GAT GCA ACG AGT G  | GAA CGC TAG AGC CTG TTT TGC ACG TTC |
| <b>Gcg</b>    | CAA GAG GAA CCG GAA CAA CAT T      | CCT GGC CCT CCA AGT AAG AA          |
| <b>Npc111</b> | GAG AGC CAA AGA TGC TAC TAT CTT CA | CCC GGG AAG TTG GTC ATG             |
| <b>Pdk4</b>   | GCA TTT CTA CTC GGA TGC TCA TG     | CCA ATG TGG CTT GGG TTT CC          |
| <b>Ppard</b>  | CTC AAT GGG GGA CCA GAA CA         | AAG GGG AGG AAT TCT GGG AGA         |
| <b>Tnf</b>    | GTA GCC CAC GTC GTA GCA AAC        | AGT TGG TTG TCT TTG AGA TCC ATG     |

**Supplementary Table 3:** qPCR primer sequences.

## Supplementary Figure 1

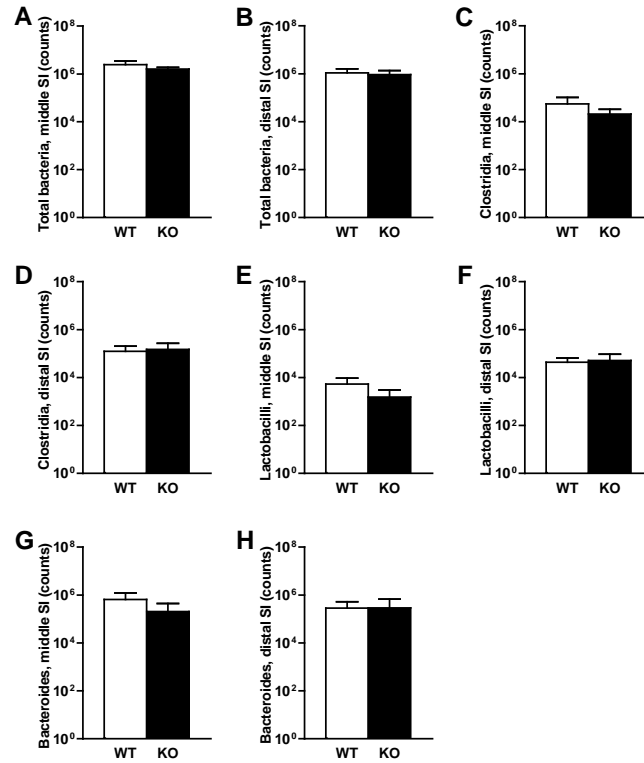

**Supplementary Figure 1.** Intestinal *PPAR $\delta$*  does not regulate bacterial colonization of small intestine. Bacterial counts of **(A,B)** total bacteria and **(C,D)** bacterial groups of Clostridium; **(E,F)** Lactobacilli and **(G,H)** Bacteroides in middle and distal part of the intestine of wild-type and *PPAR $\delta$* <sup>JEC-KO</sup> mice. (n = 4-5)

## Supplementary Figure 2

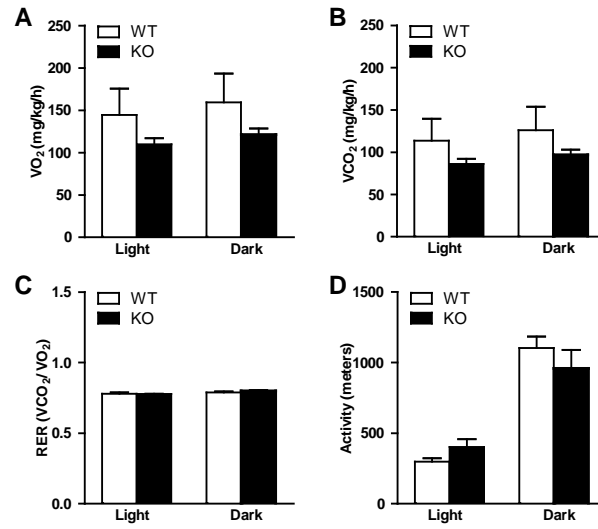

**Supplementary Figure 2. Effect of a HFD on metabolic parameters in  $PPAR\delta^{IEC-KO}$  and wild-type mice. (A) Oxygen consumption ( $VO_2$ ); (B) Carbon dioxide production ( $VCO_2$ ); (C) Respiratory exchange ratio (RER) and (D) Activity in  $PPAR\delta^{IEC-KO}$  mice and wild-type littermates (n = 4-6) after a HFD challenge.**
